# Supplementary material for: Tunable dialdehyde/dicarboxylate nanocelluloses by stoichiometrically optimized sequential periodate–chlorite oxidation for tough and wet shape recoverable aerogels
Source: Royal Society of Chemistry journal article supplement (doi:10.1039/d0na00771d), 2020-01-01
Supplement: d0na00771d1.pdf [file d0na00771d1.pdf]

**Supplementary Information**

**Tunable dialdehyde/dicarboxylate nanocelluloses by stoichiometrically optimized sequential periodate-chlorite oxidation for tough and wet shape recoverable aerogels**

Gabriel Patterson and You-Lo Hsieh<sup>a</sup>

*Biological and Agricultural Engineering, University of California, Davis, California 95616, United States.*

<sup>a</sup> *E-mail: ylhsieh@ucdavis.edu; Tel. +1 530 752 0843*

**Table S1** Reaction variables and structures of PC-nanocelluloses from the literature.<sup>16-20</sup>

| cellulose source; concentration (g/mL)        | periodate oxidation                           |                                             | chlorite oxidation                                                      |                      |                | PC-nanocelluloses                   |                             |                                                                            |                                                                                       |
|-----------------------------------------------|-----------------------------------------------|---------------------------------------------|-------------------------------------------------------------------------|----------------------|----------------|-------------------------------------|-----------------------------|----------------------------------------------------------------------------|---------------------------------------------------------------------------------------|
|                                               | NaIO <sub>4</sub> /                           | temp. time                                  | NaClO <sub>2</sub> /                                                    | CH <sub>3</sub> COOH | temp. time     | carboxy I (mmol/g)                  | Yield (%)                   | Shear force equipment, centrifugation                                      | Thickness (T) by AFM; Width (W) & Length (L) by TEM, unless specified                 |
| bleached SKP (1.5 w/v%) <sup>16</sup>         | 1.9/3 g/g dry pulp <sup>a</sup>               | RT, NR                                      | 2.8/3.5 g/g P-cell <sup>a'</sup> (NaClO <sub>2</sub> 80 % pure)         | NA; pH 5, NaOH       | RT, 20 h       | 1.0<br>2.0<br>2.5<br>3.5            | 15<br>30<br>50<br>50        | blender (Braun 4191, 0–3.5 kWh/kg)<br><br>NA                               | T: 10 – 20 nm                                                                         |
| bleached birch SKP (1 w/v%) <sup>17</sup>     | 4.8/6 g/g dry pulp <sup>b</sup>               | 55 °C, 0.25 h<br>0.5 h<br>1 h<br>2 h<br>3 h | 4:1 mol/mol NaClO <sub>2</sub> /HCO <sup>b'</sup>                       | 1 M                  | RT, 48 h       | 0.38<br>0.69<br>0.75<br>1.2<br>1.75 | 91<br>100<br>91<br>86<br>85 | high-pressure homogenizer (APV-2000, 250-950 bar)<br><br>7.5kg, 20 min     | 25 6 nm (n50) by SEM                                                                  |
| dissolving pulp (1 w/v%) <sup>18</sup>        | 8.2:10 g/g dry pulp <sup>c</sup>              | 55 °C, 0.5 h<br>2 h<br>2.5 h                | 4:1 mol/mol NaClO <sub>2</sub> /HCO 4 g P-cell (0.4 w/v%) <sup>c'</sup> | 1 M                  | RT, 48 h       | 0.44,<br>0.89,<br>1.16              | 84<br>88<br>104             | Microfluidizer (Microfluidics M-110EH-30)<br><br>NA                        | T: 2.6 nm; L: 807 nm<br>2.9 nm; L: 844 nm<br>3.6 nm; L: 656 nm<br>n=200; n=350 by AFM |
| bleached hardwood pulp (1 w/v%) <sup>19</sup> | 46 mmol/g pulp (12 g) <sup>d</sup>            | 50 °C, 2 h<br>3.75 h<br>4.5 h               | 12/12 g/g P-cell (1 w/v%) <sup>d'</sup>                                 | 1 M                  | RT, 40 h       | 0.78,<br>1.74,<br>2.0               | ND                          | Homogenizer (APV 1000, SPX Flow Technology, 60 MPa)<br><br>4.83kg, 1 h     | T: 2.5 nm, L: 375 nm<br>T: 2.7 nm, L: 127 nm<br>T: 2.7 nm, L: 96 nm (n=30)            |
| sulfite pulp (1 w/v%) <sup>20</sup>           | 0.23 M/24 g pulp (50 w/v%) <sup>e</sup>       | 50 °C, 3 h                                  | 2.013/2.0 g/g P-cell (1 w/v%) <sup>e'</sup>                             | 1 M                  | 20 °C, 16.5 h  | 1.02                                | ND                          | Homogenizer (maker not specified, 2x 50 MPa, 2x 80 MPa)<br><br>4.83kg, 1 h | T: 2.1 0.4 nm (n=35)<br>L: 525±160 nm (n=6) by AFM                                    |
| RS cellulose (1 w/v%)<br><br>this work        | 0.25:1,<br>0.5:1,<br>0.75:1<br>mol:mol<br>AGU | 55 °C, 4 h                                  | 1:1 (1 w/v% P-cell)                                                     | 0.5 M                | RT, 0.5 – 72 h | 0.64 – 1.35                         | 96±2<br>n=8                 | Blender (Vitamix 5200, 37.5k rpm)<br><br>4.83kg, 15 min                    | T: 1.3 nm (n=101)<br>W: 3.8 nm (n=100)<br>L: 1.01 μm (n=45)                           |

SKP = softwood kraft pulp; P-cell = periodate oxidized cellulose; RS = rice straw; NA = not applicable; ND = not determined; NR = not reported.

<sup>a</sup> 0.5:1 mol/mol NaIO<sub>4</sub>/AGU; <sup>a'</sup> 1:1 mol/mol NaClO<sub>2</sub>; 2.3 wt% P-cell; 30 wt% H<sub>2</sub>O<sub>2</sub>

<sup>b</sup> 0.82:1 mol/mol NaIO<sub>4</sub>/AGU; <sup>b'</sup> 4:1 NaClO<sub>2</sub>:HCO; 2:1 mol/mol NaClO<sub>2</sub>/AGU

<sup>c</sup> 0.82:1 mol/mol NaIO<sub>4</sub>/AGU; <sup>c'</sup> 4:1 NaClO<sub>2</sub>:HCO; 2:1 mol/mol NaClO<sub>2</sub>/AGU

<sup>d</sup> 0.82:1 mol/mol NaIO<sub>4</sub>/AGU; <sup>d'</sup> 2:1 mol/mol NaClO<sub>2</sub>/AGU

<sup>e</sup> 0.4:1 mol/mol NaIO<sub>4</sub>/AGU; <sup>e'</sup> 2:1 mol/mol NaClO<sub>2</sub>/AGU

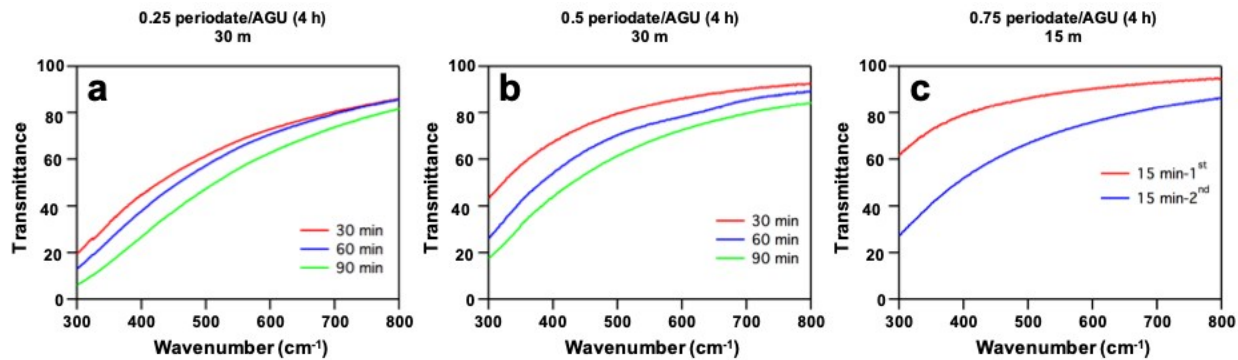

**Fig. S1** UV/Vis transmittance of PC-NC from varied NaIO<sub>4</sub>/AGU (55 C, 4 h): (a) 0.25:1; (b) 0.5:1; (c) 0.75:1.

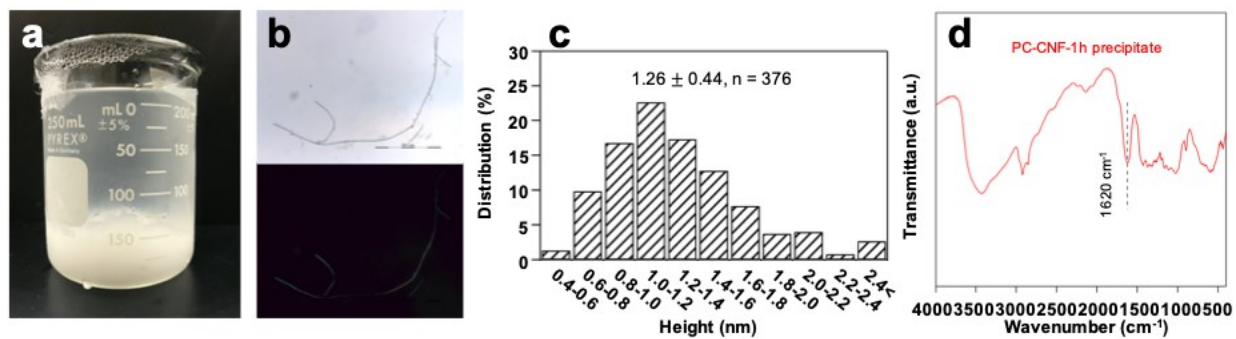

**Fig. S2** (a) Non-aqueous dispersible P-cell upon blending and storage at 4 °C overnight with (b) optical image (top) and birefringence (bottom). (c) Cumulative AFM height distribution of all PC-CNF 0.5–72 h. (d) FTIR spectrum of PC-CNF-1h air-dried precipitate fraction.

**Table S2** PC-CNF properties from varied secondary sodium chlorite (1:1 NaClO<sub>2</sub>/AGU) oxidation reaction time of optimally sodium periodate oxidized (0.5:1 NaIO<sub>4</sub>/AGU) cellulose, followed by 30 m blending.

| PC-CNF-h   | yield (%)  | carboxylate content (mmol/g) | aldehyde content (mmol/g) | height (nm) | width (nm)  | length (μm) |
|------------|------------|------------------------------|---------------------------|-------------|-------------|-------------|
| -0.5h      | 93.7       | 0.64                         | 0.71                      | 1.2 ± 0.38  | ND          | ND          |
| -1h        | 93.8       | 0.86                         | 0.69                      | 1.26 ± 0.51 | 3.83 ± 1.12 | 1.01 ± 0.16 |
| -2h        | 95.5       | 0.89                         | 0.66                      | ND          | ND          | ND          |
| -4h        | 94.1       | 0.93                         | 0.62                      | 1.24 ± 0.39 | ND          | ND          |
| -6h        | 98.6       | 0.99                         | 0.56                      | ND          | ND          | ND          |
| -8h        | 95.9       | 0.99                         | 0.56                      | ND          | ND          | ND          |
| -12h       | 94.3 ± 1.2 | 1.18                         | 0.17                      | 1.30 ± 0.49 | ND          | 1.01 ± 0.14 |
| -18h       | 97.9 ± 0.6 | 1.29                         | 0.06                      | 1.26 ± 0.40 | ND          | 1.01 ± 0.16 |
| -72h       | 98.0       | 1.35                         | 0.0                       | ND          | ND          | ND          |
| Cumulative | 95.6 ± 1.6 | NA                           | NA                        | 1.26 ± 0.44 | 3.83 ± 1.12 | 1.01 ± 0.16 |

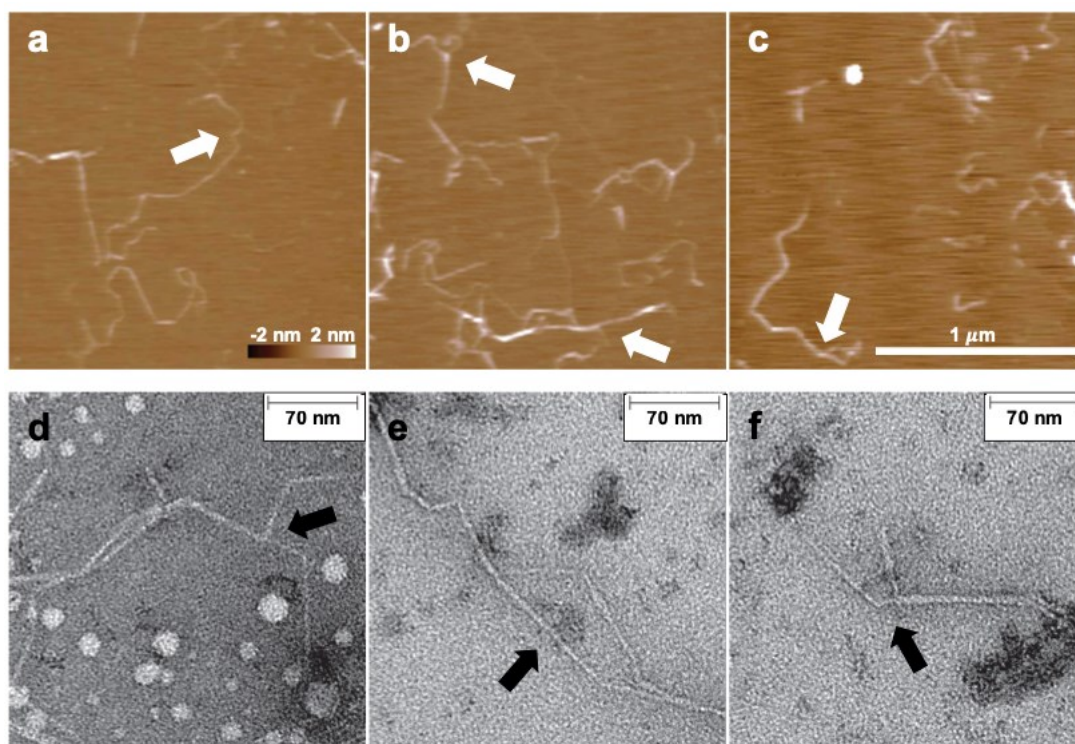

**Fig. S3** Kinks and splitting of PC-CNFs: (a–c) AFM images, (d–f) TEM images. Possible splitting event at the end of PC-CNFs (a, b, c, d, f), as well as along the lengths (b, f).

**Table S3** Further optimized secondary chlorite oxidation: reduced 0.5:1 NaClO<sub>2</sub> molar ratio and blending time. All at fixed 0.5:1 mol/mol NaIO<sub>4</sub>/AGU (55 °C, 4 h).

| NaClO <sub>2</sub> /AGU (mol/mol) | NaClO <sub>2</sub> reaction time (h) | Deprotonation | Blending time (min) | Yield (%) | Carboxyls (mmol/g) |
|-----------------------------------|--------------------------------------|---------------|---------------------|-----------|--------------------|
| 1:1                               | 4                                    | Yes           | 15                  | 72.0      | 1.16               |
|                                   | 12                                   |               | 15                  | 85.7      | 0.92               |
|                                   | 18                                   |               | 15                  | 88.3      | 1.15               |
| 1:1                               | 4                                    | No            | 30                  | 31.5      | 1.86               |
|                                   | 12                                   |               | 30                  | 30.8      | 1.03               |
|                                   | 48                                   |               | 30                  | 47.6      | 1.48               |
| 0.5:1                             | 4                                    | No            | 15                  | 15.7      | 1.12               |
|                                   |                                      |               | +15                 | 6.1       | 0.54               |
|                                   |                                      |               | +30                 | 4.1       | 0.44               |
| 0.5:1                             | 8                                    | No            | 15                  | 18.9      | 1.59               |
|                                   |                                      |               | +15                 | 5.6       | 0.89               |
|                                   |                                      |               | +30                 | 7.0       | 0.56               |

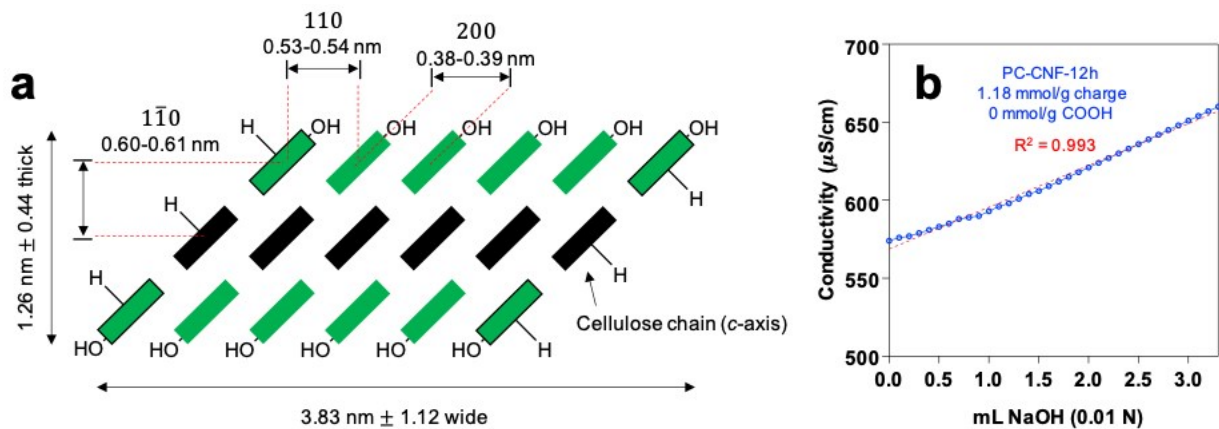

**Fig. S4** PC-CNF properties: (a) schematic of PC-CNF-1h two-directional cross-section; (b) titration without HCl of aq. PC-CNF-12h (0.05 %).

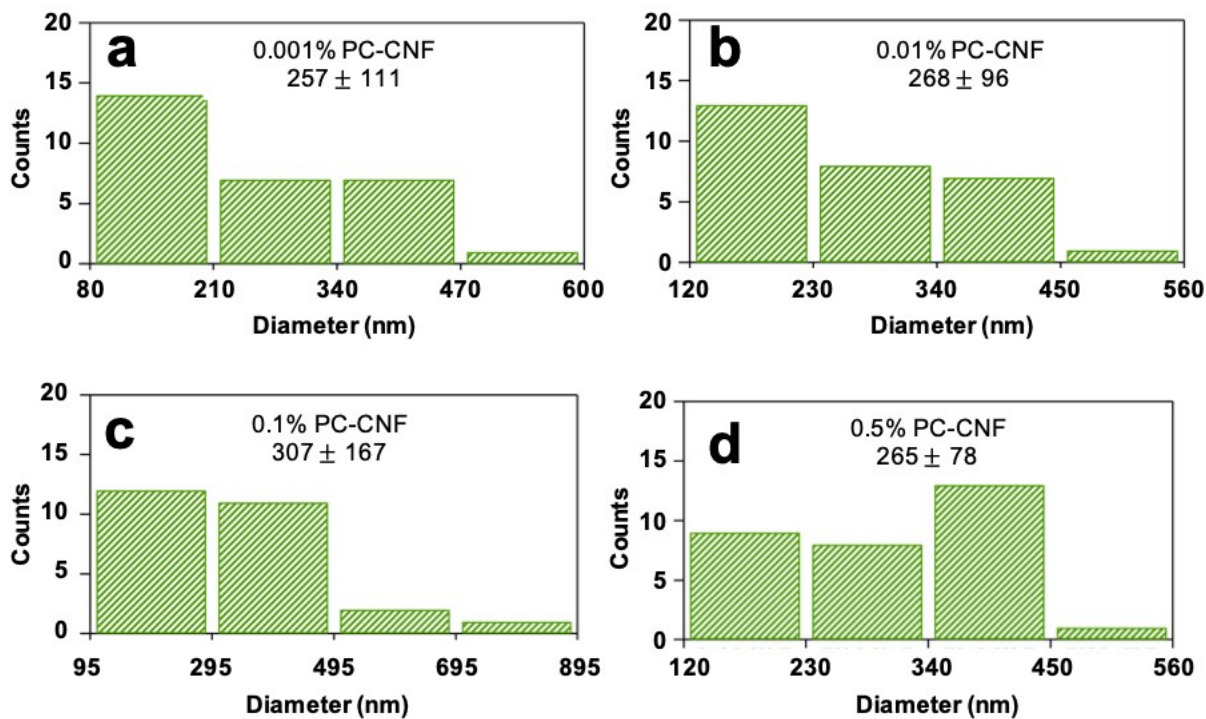

**Fig. S5** Characterization of assembled PC-CNFs-72h: (a-d) fibril diameter distributions ( $n=30$ ).



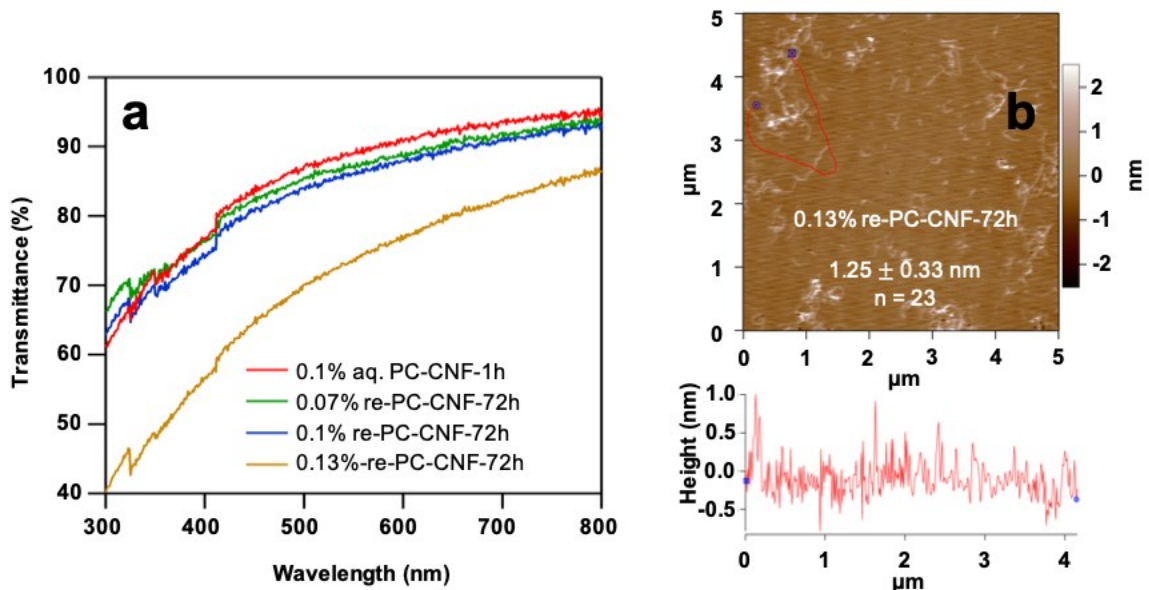

**Fig. S6** Water redispersions of PC-CNFs-72h (1.0 %): (a) UV/Vis transmittance; (b) AFM phase image (0.0005 %, mica substrate) and corresponding height trace of aqueous redispersion (0.13 %).

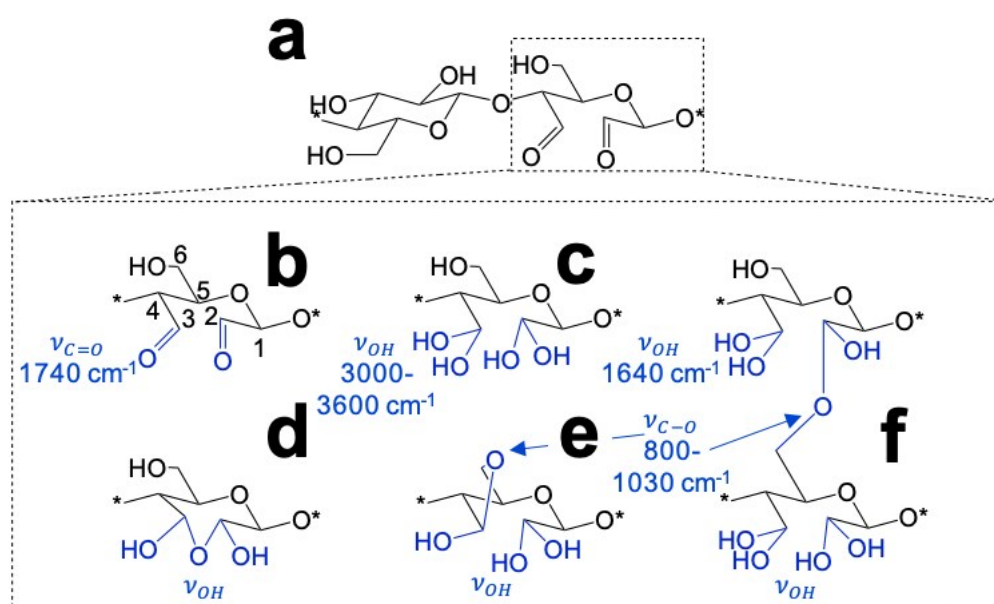

**Fig. S7** Periodate oxidized cellulose (P-cell): (a) periodate oxidized cellobiose; (b) aldehydic carbonyl at ca.  $1740\text{ cm}^{-1}$ ;<sup>1-3</sup> (c) possible hydrated aldehyde at ca.  $3400\text{ cm}^{-1}$  and  $1640\text{ cm}^{-1}$   $-\text{OH}$ ;<sup>1-3</sup> (d) hemialdol;<sup>1-3</sup> and (e) intramolecular and/or (f) intermolecular hemiacetal ca.  $875\text{ cm}^{-1}$  band.<sup>3</sup>

1. H. Spedding, *J. Chem. Soc.*, 1960, 3147–3152.

2. Q. G. Fan, D. M. Lewis and K. N. Tapley, *J. Appl. Polym. Sci.*, 2001, **82**, 1195–1202.

3. L. Münster, J. Vicha, J. Klofáč, M. Masař, P. Kucharczyk and I. Kuřitka, *Cellulose*, 2017, **24**, 2753–2766.

**Table S4** PC-CNF aerogel properties from varied secondary sodium chlorite (1:1 NaClO<sub>2</sub>/AGU)

oxidation reaction time of optimally sodium periodate oxidized (0.5:1 NaIO<sub>4</sub>/AGU) cellulose, followed by 30 m blending, freezing (-20 °C) and freeze-drying at 0.6 and 1.0 % PC-CNF and compared to TEMPO-CNF aerogel,<sup>4,5</sup> all from rice straw.

4. F. Jiang and Y.-L. Hsieh, *J. Mater. Chem. A Mater. Energy Sustain.*, 2014, **2**, 350–359.

5. F. Jiang and Y.-L. Hsieh, *ACS Appl. Mater. Interfaces*, 2017, **9**, 2825–2834.

| aerogel              | charge (mmol/g) | diameter (mm) | density (mg/cm <sup>3</sup> ) | porosity (%)  | pore volume (cm <sup>3</sup> /g) | water (mL/g)   | decane (mL/g)   | chloroform (mL/g) |
|----------------------|-----------------|---------------|-------------------------------|---------------|----------------------------------|----------------|-----------------|-------------------|
| TEMPO-CNF<br>0.6 w%  | 1.15            | 12.0<br>± 0.1 | 8.0<br>± 0.6                  | 99.5<br>± 0.0 | 125.1<br>± 9.8                   | 103.4<br>± 7.2 | 78.0<br>± 4.3   | 85.9<br>± 10.9    |
| PC-CNF-12h<br>0.6 w% | 1.18            | 14.0<br>± 0.1 | 6.2<br>± 0.3                  | 99.6<br>± 0.0 | 160.3<br>± 7.0                   | 103.3<br>± 9.4 | 129.0<br>± 10.7 | ND                |
| PC-CNF-1h<br>1.0 w%  | 0.86            | 13.8<br>± 0.1 | 10.9<br>± 0.3                 | 99.3<br>± 0.0 | 91.2<br>± 2.7                    | 82.4<br>± 4.6  | ND              | 72.1<br>± 2.8     |
| PC-CNF-4h<br>1.0 w%  | 0.93            | 13.6<br>± 0.1 | 10.6<br>± 1.0                 | 99.3<br>± 0.1 | 94.3<br>± 8.2                    | 65.3<br>± 0.0  | ND              | 67.0<br>± 5.8     |
| PC-CNF-8h<br>1.0 w%  | 0.99            | 13.6<br>± 0.2 | 10.3<br>± 0.9                 | 99.4<br>± 0.1 | 97.0<br>± 8.2                    | 62.7<br>± 10.7 | ND              | 60.8<br>± 5.3     |
| PC-CNF-12h<br>1.0 w% | 1.18            | 13.6<br>± 0.3 | 10.2<br>± 1.3                 | 99.4<br>± 0.1 | 99.4<br>± 13.5                   | 69.7<br>± 5.7  | 89.8<br>± 7.7   | ND                |
| PC-CNF-18h<br>1.0 w% | 1.29            | 14.0<br>± 0.0 | 9.1<br>± 0.1                  | 99.4<br>± 0.0 | 109.0<br>± 0.9                   | 87.1<br>± 4.9  | 86.6<br>± 7.4   | ND                |

ND = note determined. PC-CNFs in supernatant following constant blending (37.5k rpm, 30 min) and centrifugation (5k rpm, 15 min). Fixed were 1.0 cm thick aerogels casted in 1.4 cm inner diameter borosilicate glass tubes.



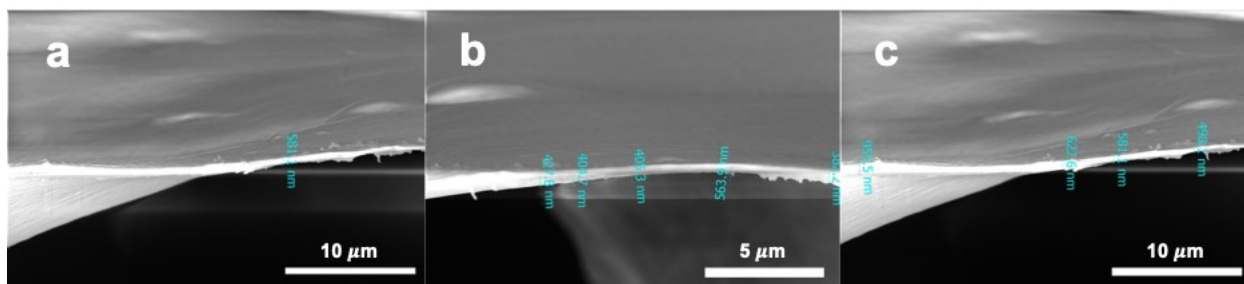

**Fig. S8** SEMs of 0.6 % PC-CNF-12 h (1.30 nm thick, 1.01 m long, with 1.18 mmol/g surface charge, at 95 % yield) aerogel radial cross-section showing cell wall thickness. Images showing measurements of three samples made in SEM QUATTRO software.

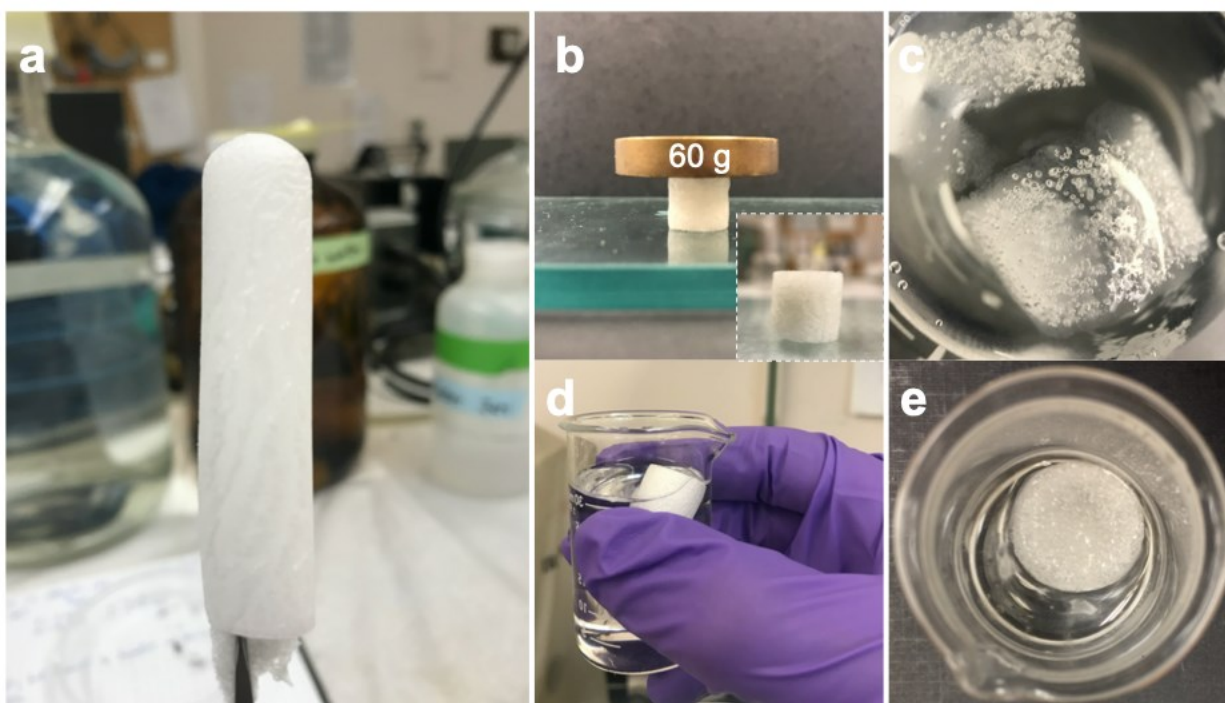

**Fig. S9** PC-CNF-8h (0.99 mmol/g) aerogel (1 %): (a) as is; (b) 20 mg (1-cm section as is inset) under 60 g weight in air; (c) wet gel saturated in water for 15 m and pressed against the glass surface with a spatula; (d) chloroform; (e) decane.

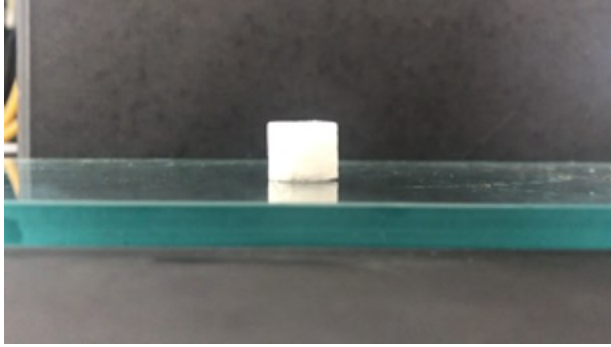

**Video S1** Dry recovery of PC-CNF-8h (1 %) aerogel

(1.4 cm diameter, 1.0 cm height, 17.3 mg, 1.7 cm<sup>3</sup>, 10.3 mg/cm<sup>3</sup>, 99.4% porosity) under 14 kg weight.

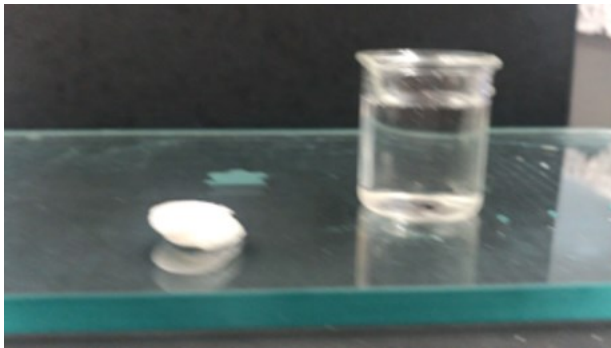

**Video S2** Water-activated 100 % shape recovery of

PC-CNF-8h (1 %) compressed to 80 % strain in air, showing full return to  $\epsilon = 0.0$  upon immersion.
